# Supplementary material for: Electrochemical analysis of speedball-like polydrug samples
Source: Royal Society of Chemistry journal article supplement (doi:10.1039/d0an01097a), 2020-01-01
Supplement: d0an01097a1.pdf [file d0an01097a1.pdf]

Supporting Information to:

## **Electrochemical Analysis of Speedball-like Polydrug Samples**

Mats de Jong<sup>a</sup>, Anca Florea<sup>a,b</sup>, Devin Daems<sup>a,b</sup>, Joren Van Loon<sup>a,c</sup>, Nele Samyn<sup>d</sup> and Karolien De Wael<sup>\*a,b</sup>

<sup>a</sup> *AXES Research Group, University of Antwerp, Groenenborgerlaan 171, 2020 Antwerp, Belgium*

<sup>b</sup> *NANOLab Centre of Excellence, University of Antwerp, Groenenborgerlaan 171, 2020 Antwerp, Belgium*

<sup>c</sup> *Product Development Research Group, University of Antwerp, Ambtmanstraat 1, 2000 Antwerp, Belgium*

<sup>d</sup> *Drugs and Toxicology Department, National Institute for Criminalistics and Criminology, Vilvoordsesteenweg 100, 1120 Brussels, Belgium*

\*E-mail: karolien.dewael@uantwerpen.be

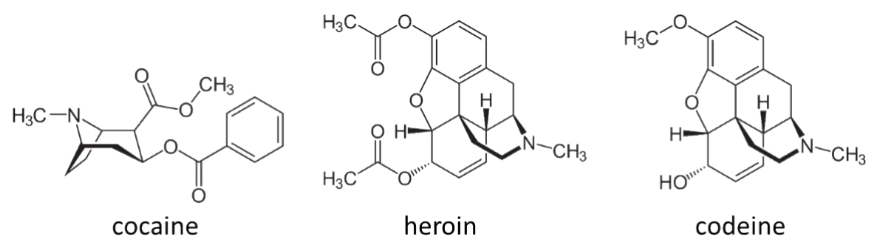

Figure S-1. Chemical structures of COC, HER and COD.

Figure S-2 shows the importance of applying a correction factor to the peak potential values of the cocaine signal if cathodic pretreatment is performed, clearly showing this potential shifts to different values when different parameters are applied for the pretreatment.

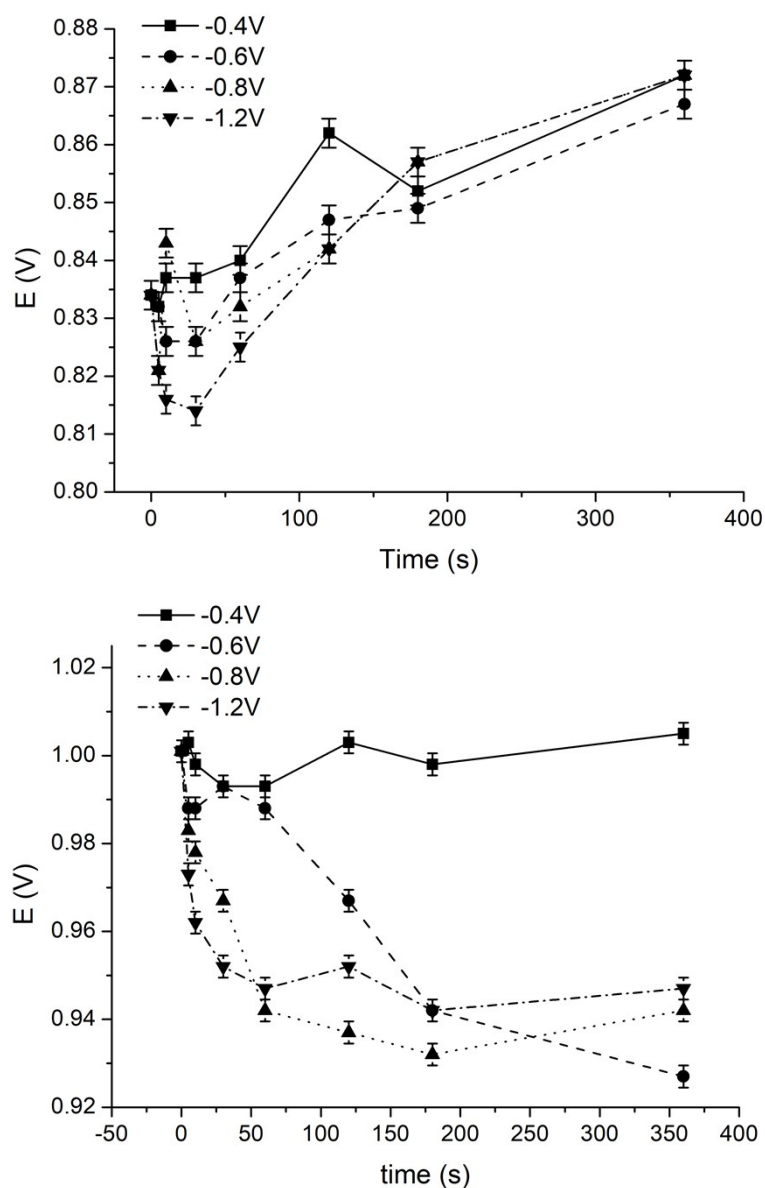

Figure S-2: Peak potentials obtained for the oxidation of a pure COC solution (1 mM) after cathodic pretreatment with different potential values and different time periods in (A) pH 12 buffer and (B) pH 7 buffer.

Using pH 7 buffer, multiple pretreatment parameters provide a solution for the detection of cocaine in mixtures with heroin. Figure S-3 shows all these suitable conditions where the signals of cocaine and heroin could be distinguished, in addition showing the intensity of the cocaine signal as well.

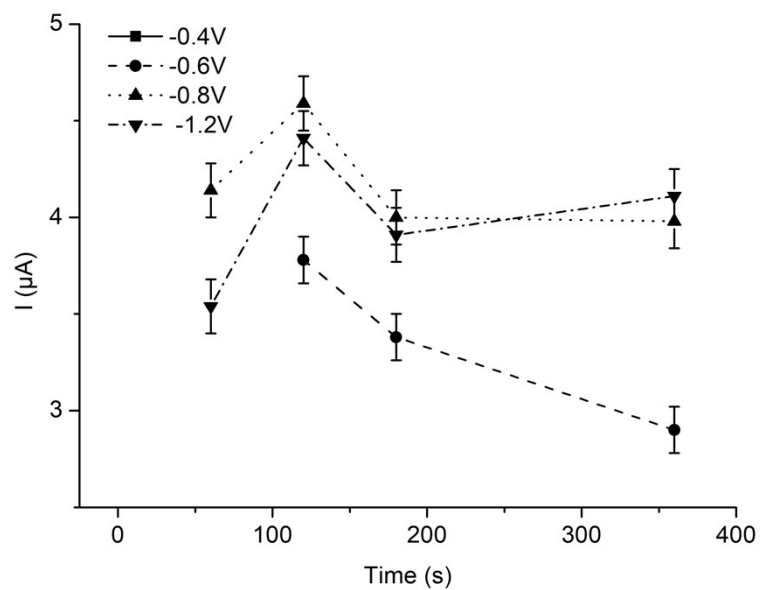

Figure S-3: Peak currents obtained for the oxidation of COC in a binary mixture (1:0.5 mM) with HER in pH 7 buffer after cathodic pretreatment with potential values -0.4, -0.6, -0.8 and -1.2 V and time periods 0, 5, 10, 30, 60, 120, 180 and 360 s.

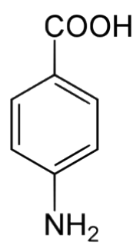

*p*-amino benzoic acid

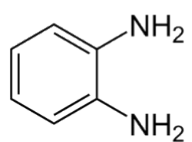

*o*-phenylenediamine

Figure S-4. Chemical structure of the PABA and OPD monomers.

Figure S-5 shows the data of the electropolymerization process of orthophenylenediamine on the graphene modified screen printed electrode. The increasing intensity with each scan around potential 0 V shows the polymerization is successful.

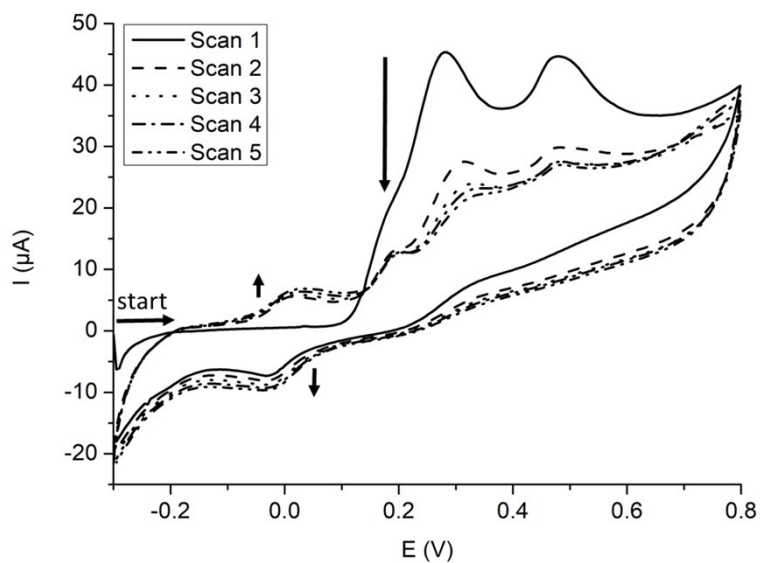

Figure S-5: Cyclic voltammograms for electrochemical polymerization of 1 mM OPD in PBS pH 7 at GPH-SPE. Scan rate 50 mV/s.
